# Supplementary material for: Impacts of climate change on mangrove subsistence fisheries: a global review
Source: PubMed Central journal article supplement (PMC11602924; doi:10.1007/s42995-024-00231-3), 2024-06-05
Supplement: 42995_2024_231_MOESM1_ESM.pdf [file 42995_2024_231_MOESM1_ESM.pdf]

**Supplemental material for: Impacts of climate change on mangrove subsistence fisheries: A global review**

\*Roann P. Alberto<sup>a</sup>, Judith A. Teano<sup>b</sup>, Annie Melinda Paz-Alberto<sup>c</sup>, Mark Anthony B. Tangonan<sup>d</sup>, Hazel Jade E. Villamar<sup>e</sup>, Sarah Clement<sup>f</sup>, \*David J. S. Montagnes<sup>g</sup>, Andrew P. Morse<sup>h</sup>

\*Corresponding authors at: Entrepreneurship, College of Business Administration and Accountancy, Central Luzon State University, Science City of Munoz, Nueva Ecija, 3120, Philippines

Email address: R.P. Alberto@liverpool.ac.uk (Roann Alberto)

\*Department of Evolution, Ecology and Behaviour, University of Liverpool, BioSciences Building, Crown Street, Liverpool, L69 7ZB.

E-mail address: dmontag@liv.ac.uk (D.J.S.Montagnes)

*<sup>a</sup>Entrepreneurship, College of Business Administration and Accountancy, Central Luzon State University, Science City of Munoz, Nueva Ecija, 3120, Philippines*

*<sup>b</sup>Environmental Economics, College of Business Administration and Accountancy, Central Luzon State University, Science City of Munoz, Nueva Ecija, 3120, Philippines*

*<sup>c</sup>Retired University Professor, Ecology and Environmental Management, Institute for Climate Change and Environmental Management, Central Luzon State University, Science City of Munoz, Nueva Ecija, 3120, Philippines*

*<sup>d</sup>Accountancy and Finance, College of Business Administration and Accountancy, Central Luzon State University, Science City of Munoz, Nueva Ecija, 3120, Philippines*

*<sup>e</sup>Accountancy and Finance, College of Business Administration and Accountancy, Central Luzon State University, Science City of Munoz, Nueva Ecija, 3120, Philippines*

*<sup>f</sup>Environmental Policy, Australian National University, Canberra ACT 2601, Australia*

*<sup>g</sup>Department of Evolution, Ecology & Behaviour, University of Liverpool, BioSciences Building, Crown Street, Liverpool, L69 7ZB, UK*

*<sup>h</sup>School of Environmental Sciences, Roxby Building, University of Liverpool, L69 7ZT, UK*

## Supplemental Materials Section

**NOTE:** Supplements 2 and 4 are annotated Excel files and are presented separately from this document: An estimate of the fishing-days lost due to climate impacts.xlsx and Fishing practices survey on mangrove subsistence fishers in Zambales, Philippines.xlsx.

**Supplement 1:** this supplement provides support for arguments made in the main text; i.e., the tables below are referred to in the main text.

**Table S1** Typhoons and their effects on coastal communities. These data are not exhaustive and do not include all historical typhoons, cyclones, and hurricanes; sources are presented as numbered footnote associated with the typhoon name. Inclusion is limited to typhoon categories 4 and 5, that have caused major devastation to coastal communities between 2013-2023. The Saffir-Simpson scale was used to determine wind speed (NHC NOAA 2023 - <https://www.nhc.noaa.gov/aboutsshws.php>).

<sup>1</sup>ADRC (2019), <sup>2</sup>Aguilar-Roman et al. (2020), <sup>3</sup>Aquino et al. (2018), <sup>4</sup>Business Standard (2016), <sup>5</sup>Cahigas et al. (2023), <sup>6</sup>Chauhan et al. (2020), <sup>7</sup>DFAT (2021), <sup>8</sup>Ezer (2020), <sup>9</sup>Hallwright and Handmer (2019), <sup>10</sup>Keriwala and Patel (2022), <sup>11</sup>Kishore et al. (2018), <sup>12</sup>Kumar et al. (2021), <sup>13</sup>Li and Huang (2018), <sup>14</sup>Mangubhai et al. (2021), <sup>15</sup>Marlier et al. (2022), <sup>16</sup>Monteclaro et al. (2018), <sup>17</sup>Nair (2021), <sup>18</sup>NHC-NOAA (2014), <sup>19</sup>NHC-NOAA (2018a), <sup>20</sup>NHC-NOAA (2018b), <sup>21</sup>NHC-NOAA (2020), <sup>22</sup>NPR (2018), <sup>23</sup>OCHA (2020), <sup>24</sup>Parida et al. (2018), <sup>25</sup>Reliefweb (2015), <sup>26</sup>Reliefweb (2017), <sup>27</sup>Reliefweb (2019), <sup>28</sup>Reliefweb (2023), <sup>29</sup>Santos et al. (2016), <sup>30</sup>Santos (2021), <sup>31</sup>Senkbeil et al. (2020), <sup>32</sup>UNESCAP (2021), <sup>33</sup>Wingard et al. (2019), <sup>34</sup>World Bank (2014), <sup>35</sup>World Bank (2015), <sup>36</sup>World Vision (2020)

| Name                         | Year | Category                           | Wind speed<br>(m s <sup>-1</sup> ) | Location                                | Storm surge<br>height (m) | Storm surge<br>Damage Scale | Homes Destroyed<br>(x1000) | Deaths |
|------------------------------|------|------------------------------------|------------------------------------|-----------------------------------------|---------------------------|-----------------------------|----------------------------|--------|
| <i>North Atlantic</i>        |      |                                    |                                    |                                         |                           |                             |                            |        |
| Irma <sup>15,33,36</sup>     | 2017 | Category 5                         | 79                                 | United States/<br>Caribbean             | 0.9-1.5                   | Minimal                     | 6,000                      | 129    |
| Maria <sup>11,15,22</sup>    | 2017 | Category 5                         | 78                                 | Puerto Rico                             | 1.8-2.7                   | Extensive                   | 10                         | 4,000  |
| Michael <sup>19,31</sup>     | 2018 | Category 5                         | 72                                 | Florida USA                             | 4.6                       | Extreme                     | 180                        | 16     |
| Dorian <sup>8,28</sup>       | 2019 | Category 5                         | 82                                 | Bahamas                                 | 1.5                       | Minimal                     | 76                         | 74     |
| Iota <sup>21</sup>           | 2020 | Category 4                         | 69                                 | Central America                         | 4.6-6.1                   | Catastrophic                | 63                         | 84     |
| <i>Eastern Pacific Ocean</i> |      |                                    |                                    |                                         |                           |                             |                            |        |
| Odile <sup>18</sup>          | 2014 | Category 4                         | 1                                  | Mexico                                  | 1.8-3                     | Moderate                    | 10                         | 5      |
| Patricia <sup>2</sup>        | 2015 | Category 5                         | 98                                 | Mexico, Central<br>America              | 3                         | Extensive                   | 9                          | 13     |
| Willa <sup>20</sup>          | 2018 | Category 5                         | 72                                 | Mexico                                  | 2.7                       | Extensive                   | 7                          | 9      |
| <i>Western Pacific Ocean</i> |      |                                    |                                    |                                         |                           |                             |                            |        |
| Haiyan <sup>16,29,30</sup>   | 2013 | Violent typhoon                    | 64                                 | Philippines                             | 7.6                       | Catastrophic                | 1,100                      | 7,000  |
| Vongfong <sup>23</sup>       | 2014 | Violent typhoon                    | 60                                 | Philippines                             | 1.8-4.0                   | Extensive                   | 180                        | 2      |
| Soudelor <sup>13,25</sup>    | 2015 | Violent typhoon                    | 60                                 | Eastern China, Taiwan                   | 14.63                     | Catastrophic                | 69                         | 33     |
| Meranti <sup>4</sup>         | 2016 | Violent typhoon                    | 61                                 | China, Taiwan                           | 2.1-3.0                   | Extensive                   | 331                        | 28     |
| Haima <sup>19,26,32</sup>    | 2016 | Violent typhoon                    | 60                                 | Philippines                             | 4.6                       | Extreme                     | 200                        | 14     |
| Rai <sup>5</sup>             | 2021 | Violent typhoon                    | 61                                 | Philippines                             | 3                         | Extensive                   | 400                        | 410    |
| <i>North Indian Ocean</i>    |      |                                    |                                    |                                         |                           |                             |                            |        |
| Phailin <sup>24,34</sup>     | 2013 | Extremely severe<br>cyclonic storm | 60                                 | India                                   | 6.1                       | Catastrophic                | 500                        | 10,000 |
| Hudhud <sup>1</sup>          | 2014 | Extremely severe<br>cyclonic storm | 51                                 | Nepal/India                             | 7.9                       | Catastrophic                | 920                        | 45     |
| Fani <sup>6,27</sup>         | 2019 | Extremely severe<br>cyclonic storm | 60                                 | India, Bangladesh                       | 1.2-1.5                   | Minimal                     | 189                        | 89     |
| Amphan <sup>12</sup>         | 2020 | Super cyclonic<br>storm            | 67                                 | India, Bangladesh                       | 10.36                     | Catastrophic                | 1,000                      | 84     |
| Tauktae <sup>10,17,32</sup>  | 2021 | Extremely severe<br>cyclonic storm | 51                                 | India, Maldives,<br>Pakistan, Sri Lanka | 3.4                       | Extensive                   | 56                         | 67     |
| <i>South Pacific Ocean</i>   |      |                                    |                                    |                                         |                           |                             |                            |        |
| Pam <sup>9,35</sup>          | 2014 | Category 5                         | 69                                 | Vanuatu                                 | 13.41                     | Catastrophic                | 188                        | 11     |
| Winston <sup>3</sup>         | 2015 | Category 5                         | 78                                 | Fiji                                    | 3                         | Moderate                    | 40                         | 44     |
| Harold <sup>7,14</sup>       | 2019 | Category 5                         | 64                                 | Fiji                                    | 3                         | Moderate                    | 180                        | 31     |

**Table S2** The effect of suspended sediment levels on fish, crustaceans, and molluscs. Estimates are based on freshwater species (Birtwell 2000), and the criteria are neither species-specific nor life stage specific.

| Suspended sediment load (g L <sup>-1</sup> ) | Risk to fish and their habitats                                                                                    |
|----------------------------------------------|--------------------------------------------------------------------------------------------------------------------|
| 0                                            | No risk                                                                                                            |
| <25                                          | Very low risk - No evidence of harmful effects on stocks                                                           |
| 25-100                                       | Low risk - It should be possible to maintain moderately healthy stocks, but the yield would be somewhat diminished |
| 100-200                                      | Moderate risk - These waters are unlikely to support healthy stocks                                                |
| 200-400                                      | High risk - at best, only poor fisheries are likely to be found                                                    |
| >400                                         | Unacceptable risk - mortality                                                                                      |

**Table S3** Typhoon-related flooding events that have caused mangrove root burial and mortality. Sources are presented as numbered footnote associated with the typhoon name.

| <b>Typhoon/Hurricane</b> | <b>Year</b> | <b>Location</b> | <b>Sediment Deposition<br/>affecting the mangrove roots (cm)</b> |
|--------------------------|-------------|-----------------|------------------------------------------------------------------|
| Donna                    | 1962        | USA             | 12-13 <sup>3</sup>                                               |
| Ofa                      | 1990        | American Samoa  | 13 <sup>3</sup>                                                  |
| Mitch                    | 1998        | Central America | 100 <sup>2</sup>                                                 |
| Wilma                    | 2005        | USA             | 8-10 <sup>4</sup>                                                |
| Haiyan                   | 2013        | Philippines     | 1000 <sup>1</sup>                                                |
| Irma                     | 2017        | USA             | 12 <sup>4,5</sup>                                                |

<sup>1</sup>Brill et al. (2016), <sup>2</sup>Cahoon et al. (2003), <sup>3</sup>Ellison (1999), <sup>4</sup>Feher et al. (2019), <sup>5</sup>Wingard et al. (2019)

**Table S4** Frequency (per year) and duration (days) of heat waves and typhoons, and an estimate of the fishing-days directly lost per year by these (i.e., the product of frequency and duration). We assumed that high-category typhoons produced flooding that led to five further days lost (CDC 2017). Total days (d) are obtained by adding the fishing days directly lost (d) to flood-affected days (d). See *Baseline annual estimates of climate impacts 2016-2020* for details.

|                               | Frequency (per year) | Duration (d) | Fishing days directly lost (d) | Flood-affected days (d) | Total days (d) |
|-------------------------------|----------------------|--------------|--------------------------------|-------------------------|----------------|
| <i>Heat waves</i>             | 2                    | 5            | 10                             |                         | <b>10</b>      |
| <i>Low-category typhoon</i>   |                      |              |                                |                         |                |
| Category 1                    | 5                    | 2            | 10                             |                         | 10             |
| Category 2                    | 2                    | 2            | 4                              |                         | 4              |
|                               |                      |              |                                |                         | <b>14</b>      |
| <i>High-category typhoons</i> |                      |              |                                |                         |                |
| Category 3                    | 1                    | 3            | 3                              | 5                       | 8              |
| Category 4                    | 3                    | 4            | 12                             | 5                       | 17             |
| Category 5                    | 1                    | 3            | 3                              | 5                       | 8              |
|                               |                      |              |                                |                         | <b>33</b>      |

**Table S5** Possible loss of stocks by environmental events caused by discrete climate impacts. Losses are in decimal fractions of the stock lost, and ranges are from data across the literature (denoted by superscripts). For details see, *Stock: fishing-days lost, based on depletion of stocks due to climate impacts.*

| Impact                        | Effects     | Stock   | Loss range                         |
|-------------------------------|-------------|---------|------------------------------------|
| <i>Heat waves</i>             | Salinity    | Fish    | 0.10-0.50 <sup>3,36,37</sup>       |
|                               |             | Crabs   | 0.20-0.40 <sup>14,18,28</sup>      |
|                               |             | Prawns  | 0.20-0.65 <sup>2,27,38</sup>       |
|                               |             | Oysters | 0.50-0.80 <sup>21,32,35</sup>      |
|                               | Temperature | Fish    | 0.30-0.70 <sup>11,24,26,34</sup>   |
|                               |             | Crabs   | 0.10-0.90 <sup>9,10,26,29,34</sup> |
|                               |             | Prawns  | 0.10-0.90 <sup>17,34</sup>         |
|                               |             | Oysters | 0.35-0.60 <sup>9,10,21,32,35</sup> |
|                               | Oxygen      | Fish    | 0.10-0.72 <sup>23,25,31</sup>      |
|                               |             | Crabs   | 0.30-0.50 <sup>14,16</sup>         |
|                               |             | Prawns  | 0.05-0.50 <sup>1,27,38</sup>       |
|                               |             | Oysters | 0.25-0.70 <sup>4,13</sup>          |
| <i>Low-category typhoons</i>  | Salinity    | Fish    | 0.04-0.40 <sup>3,36</sup>          |
|                               |             | Crabs   | 0.10-0.30 <sup>14,18,28</sup>      |
|                               |             | Prawns  | 0.10-0.40 <sup>2,27,38</sup>       |
|                               |             | Oysters | 0.10-0.50 <sup>15,32,35</sup>      |
|                               | Oxygen      | Fish    | 0.10-0.30 <sup>23,25,31</sup>      |
|                               |             | Crabs   | 0.10-0.30 <sup>14,16</sup>         |
|                               |             | Prawns  | 0.05-0.30 <sup>1,27,38</sup>       |
|                               |             | Oysters | 0.10-0.20 <sup>4,13,20</sup>       |
| <i>High-category typhoons</i> | Salinity    | Fish    | 0.10-0.40 <sup>3,36</sup>          |
|                               |             | Crabs   | 0.30-0.70 <sup>14,18,28</sup>      |
|                               |             | Prawns  | 0.20-0.70 <sup>2,27,38</sup>       |
|                               |             | Oysters | 0.50-0.80 <sup>15,21,32,35</sup>   |
|                               | Sediment    | Fish    | 0.05-0.40 <sup>6,7,22</sup>        |
|                               |             | Crabs   | 0.20-0.80 <sup>7,22,33</sup>       |
|                               |             | Prawns  | 0.05-0.25 <sup>8,19</sup>          |
|                               |             | Oysters | 0.50-0.90 <sup>7,12,22,30</sup>    |
|                               | Oxygen      | Fish    | 0.10-0.72 <sup>23,25,31</sup>      |
|                               |             | Crabs   | 0.30-0.50 <sup>14,16</sup>         |
|                               |             | Prawns  | 0.05-0.50 <sup>1,27,38</sup>       |
|                               |             | Oysters | 0.25-0.70 <sup>4,13,20</sup>       |

<sup>1</sup>Allan and Maguire (1991), <sup>2</sup>Allan and Maguire (1992), <sup>3</sup>Bachman and Rand (2008), <sup>4</sup>Baker and Mann (1992), <sup>6</sup>Bash et al. (2001), <sup>7</sup>Birtwell (2000), <sup>8</sup>Bommireddy et al. (2021), <sup>9</sup>Caputi et al. (2016), <sup>10</sup>Caputi et al. (2019), <sup>11</sup>Cheung and Frolicher (2020), <sup>12</sup>Colden and Lipcius (2015), <sup>13</sup>Coxe (2022), <sup>14</sup>Davenport and Wong (1987), <sup>15</sup>Des et al. (2021), <sup>16</sup>Faturrohman et al. (2017), <sup>17</sup>Hewitt and Duncan (2002), <sup>18</sup>Ji et al. (2022), <sup>19</sup>Kathyayani et al. (2019), <sup>20</sup>Long et al. (2008), <sup>21</sup>Lowe et al. (2017), <sup>22</sup>Lunt and Smee (2014), <sup>23</sup>McNatt and Rice (2004), <sup>24</sup>Mora and Ospina (2001), <sup>25</sup>Plante et al. (2005), <sup>26</sup>Roberts et al. (2019), <sup>27</sup>Rosas et al. (1998), <sup>28</sup>Ruscoe et al. (2004), <sup>29</sup>Sanda et al. (2022), <sup>30</sup>Sanders et al. (2015), <sup>31</sup>Seager et al. (2000), <sup>32</sup>Sehlinger (2018), <sup>33</sup>Shives and Dunbar (2010), <sup>34</sup>Vinagre et al. (2015), <sup>35</sup>Wang and Li (2018), <sup>36</sup>Whitfield et al. (2006), <sup>37</sup>Young et al. (2022), <sup>38</sup>Zhang et al. (2006).

**Table S6** Estimates of in situ losses caused by discrete climate impacts and the recovery times of stocks after these (i.e., values applied in the model). Values are: 1) the fraction of a stock lost per event (see *Stocks: fishing-days lost, based on depletion of stocks due to climate impacts*) and 2) the fraction of a year for a stock to reach harvestable sizes, after stock losses (see footnotes for sources).

| Impact                        | Stocks  | Fraction of stock lost per event | Fraction of a year to reach harvestable size |
|-------------------------------|---------|----------------------------------|----------------------------------------------|
| <i>Heat waves</i>             |         |                                  |                                              |
|                               | Fish    | 0                                | 0.77 <sup>5,7,8</sup>                        |
|                               | Crabs   | 0.03                             | 0.61 <sup>6,12</sup>                         |
|                               | Prawn   | 0.04                             | 0.53 <sup>3,4,9</sup>                        |
|                               | Oysters | 0.05                             | 1.19 <sup>1,2,10,11</sup>                    |
| <i>Low-category typhoons</i>  |         |                                  |                                              |
|                               | Fish    | 0                                | 0.76 <sup>5,7,8</sup>                        |
|                               | Crabs   | 0                                | 0.60 <sup>12</sup>                           |
|                               | Prawn   | 0                                | 0.52 <sup>3,4,9</sup>                        |
|                               | Oysters | 0.01                             | 1.18 <sup>1,2</sup>                          |
| <i>High-category typhoons</i> |         |                                  |                                              |
|                               | Fish    | 0.03                             | 0.86 <sup>5,7,8</sup>                        |
|                               | Crabs   | 0.05                             | 0.69 <sup>12</sup>                           |
|                               | Prawn   | 0.07                             | 0.61 <sup>3,4,9</sup>                        |
|                               | Oysters | 0.1                              | 1.28 <sup>1,2,10,11</sup>                    |

<sup>1</sup>Barman et al. (2022), <sup>2</sup>Bordignon et al. (2020), <sup>3</sup>Boyd et al. (2002), <sup>4</sup>Briggs et al. (2004), <sup>5</sup>Britten et al. (2017), <sup>6</sup>Chandrapavan et al. (2019), <sup>7</sup>Dinh et al. (2022), <sup>8</sup>FAO (2009a), <sup>9</sup>FAO (2009b), <sup>10</sup>Hansten (2017), <sup>11</sup>Hong et al. (2022), <sup>12</sup>Jumawan et al. (2021)



**Table S7** Sick-days arising from the most common illnesses due to discrete climate impacts. The illness with the longest duration is in bold (i.e., the value used in the model, see *Fishers: fishing-days lost based on climate impacts on fishers and their gear*). Sick-days were calculated as the product of the recovery days of an illness and its likelihood of occurring, based on literature data (see footnotes for sources).

| Impact                        | Disease/Illness     | Likelihood | Recovery-days (d) | Sick days (d)                 |
|-------------------------------|---------------------|------------|-------------------|-------------------------------|
| <i>Heat waves</i>             |                     |            |                   |                               |
|                               | Dehydration         | 0.50       | 2                 | 1.0 <sup>10,18</sup>          |
|                               | Heat stroke         | 0.18       | 7                 | <b>1.2</b> <sup>3,11,19</sup> |
| <i>Low-category typhoons</i>  |                     |            |                   |                               |
|                               |                     |            |                   |                               |
|                               | Diarrhoea           | 0.96       | 3                 | 2.9 <sup>14,22</sup>          |
|                               | Influenza           | 0.85       | 7                 | <b>6.0</b> <sup>13</sup>      |
|                               | Dengue fever        | 0.67       | 7                 | 4.7 <sup>7,9,16</sup>         |
| <i>High-category typhoons</i> |                     |            |                   |                               |
|                               |                     |            |                   |                               |
|                               | Influenza           | 0.85       | 7                 | 6.0 <sup>13</sup>             |
| Water-borne                   | Cholera             | 0.97       | 6                 | 5.8 <sup>2,24</sup>           |
|                               | Diarrhoea           | 0.96       | 3                 | 2.9 <sup>14,22</sup>          |
|                               | Leptospirosis       | 0.59       | 14                | <b>8.3</b> <sup>5,21</sup>    |
|                               | Hepatitis A         | 0.61       | 7                 | 4.3 <sup>6,12,23</sup>        |
|                               | Typhoid fever       | 0.24       | 7                 | 1.7 <sup>1,8,17</sup>         |
| Vector-borne                  |                     |            |                   |                               |
|                               | Dengue fever        | 0.67       | 7                 | 4.7 <sup>7,9,16</sup>         |
|                               | Malaria             | 0.074      | 7                 | 0.5 <sup>8,20</sup>           |
| Physical Injury               |                     |            |                   |                               |
|                               | Cuts and contusions | 0.10       | 4                 | 0.4 <sup>4,15</sup>           |
|                               | Lacerations         | 0.60       | 21                | 0.1 <sup>4</sup>              |
|                               | Fractures           | 0.01       | 56                | 0.56 <sup>4</sup>             |

<sup>1</sup>Akhir et al. (2018), <sup>2</sup>Ali et al. (2015), <sup>3</sup>Arsad (2019), <sup>4</sup>Bartholdson and von Schreeb (2018), <sup>5</sup>CDC (2017), <sup>6</sup>CDC (2020), <sup>7</sup>CDC (2021), <sup>8</sup>CDC (2022), <sup>9</sup>Chan and Johansson (2012), <sup>10</sup>Cleveland clinic (2023), <sup>11</sup>Davis (2022), <sup>12</sup>Franco et al. (2012), <sup>13</sup>Go Cheng et al. (2020), <sup>14</sup>Health Australia (2023), <sup>15</sup>Knight (2008), <sup>16</sup>Li et al. (2021), <sup>17</sup>Liu et al. (2018), <sup>18</sup>Manning (2007), <sup>19</sup>Mastrangelo et al. (2007), <sup>20</sup>Nsereko et al. (2020), <sup>21</sup>Rajapakse (2022), <sup>22</sup>Ventura et al. (2015), <sup>23</sup>WHO (2010), <sup>24</sup>WHO (2022).

**Table S8** Estimated days to replace damaged fishing gear after it had been destroyed by a discrete climate impact. For details see *Fishers: fishing-days lost based on impacts on fishers and their gear*.

| Stock          | Gear         | Fraction of gear per stock | Days to replace gear (d) |
|----------------|--------------|----------------------------|--------------------------|
|                |              |                            |                          |
| <i>Fish</i>    |              |                            |                          |
|                | Gillnets     | 0.5                        | 4                        |
| <i>Crabs</i>   |              |                            |                          |
|                | Crab pots    | 0.22                       | 1                        |
| <i>Prawns</i>  | Scoop net    | 0.07                       | 2                        |
| <i>Oysters</i> | Rakes/scythe | 0.21                       | 0.5                      |

**Table S9** Three scenarios of predicted change of climate impacts on mangrove ecosystems in Zambales, Philippines for 2030 (see *Estimating the increase in days lost in 2030 for Zambales, Philippines*). RCP values outline future climate scenarios based on varying levels of greenhouse gases, affecting how much heat is trapped by atmosphere (van Vuuren et al. 2011). Values are expressed as fractions that denote the increase due to climate change, above our baseline values. Note, that negative values denote a decrease in the current impacts.

| <b>Impact scenario</b>        | <b>Projected fractional change between 2020 and 2030</b> |
|-------------------------------|----------------------------------------------------------|
| <i>Heat waves</i>             |                                                          |
| Mid-estimate (RCP 4.5)        | 0.30                                                     |
| High-estimate (RCP 8.5)       | 0.60                                                     |
| Low-estimate (RCP 2.6)        | 0.12                                                     |
|                               |                                                          |
| <i>Low-category typhoons</i>  |                                                          |
| Mid-estimate (RCP 4.5)        | -0.46                                                    |
| High-estimate (RCP 8.5)       | -0.37                                                    |
| Low-estimate (RCP 2.6)        | -0.46                                                    |
|                               |                                                          |
| <i>High-category typhoons</i> |                                                          |
| Mid-estimate (RCP 4.5)        | 0.17                                                     |
| High-estimate (RCP 8.5)       | 0.21                                                     |
| Low-estimate (RCP 2.6)        | 0.07                                                     |

**Supplement 2:** an annotated Excel file of the model describe in Supplement 2 (An estimate of the fishing-days lost due to climate impacts).

**Supplement 3:** fishing practices survey on mangrove subsistence fishers in Zambales, Philippines.

To augment published data, we conducted a survey to analyse the practices of mangrove subsistence fishers ( $n = 35$ ) in Zambales, Philippines (E 119° 57.648', N 15° 31.7132'), which is a typical mangrove ecosystem that supports a wide range of fishing activities (Empeno and Gregorio 2015). The survey assessed: 1) the average mass and daily quantity of their catch; 2) the cost and amount of fishing gear; 3) the market price of commonly caught stocks; 4) the number of fishing days per month; 5) the duration of daily fishing activity; 6) the duration of daily active fishing hours; and 7) the days lost per year due to heat waves, low-category, and high-category typhoons. Data were collected between July and September 2023 by telephone interviews lasting 15 to 30 minutes (see Supplement 4, *Fishing practices survey on mangrove subsistence fishers in Zambales, Philippines*).

From the average mass ( $M$ ) of stocks caught, we calculated the proportion of each individual stock – fish, crabs, prawns, and oysters – that each fisher catches, relative to the total mass of the catch, using the formula:  $\text{proportion} = M_{\text{stock}}/M_{\text{total}}$ , where  $M_{\text{stock}}$  and  $M_{\text{total}}$  represent the mass of the individual stock and the total mass of all stocks, respectively (Supplement 5, *Survey on the daily catch and gear utilised by mangrove subsistence fishers*). Similarly, from the gear data, we determined the proportion of gear ( $G$ ) lost for each stock based on our survey of subsistence fishers using the same formula:  $\text{Proportion} = G_{\text{stock}}/G_{\text{total}}$ , where  $G_{\text{stock}}$  and  $G_{\text{total}}$  denote the number of gear lost for each stock and the total gear lost across all stocks. Additional insights were gathered on the types of mangrove stocks commonly caught, the preferred fishing techniques, and other useful information such as the effect of impacts on gear damage.

From the data collected, we calculated mean effects and their standard deviations. We also present average, maximum, and minimum responses, these are not included in the analysis (see *Statistical summary of response, Fishing practices survey on mangrove subsistence fishers in Zambales, Philippines*). Lastly, the percentage difference between literature values and fishers' data serves as a validity check against established research, which we refer to in the main text see *Impacts of climate change on mangrove subsistence fisheries: A global review*.

**Supplement 4:** an annotated excel file of the survey results in Supplement 3 (*Fishing practices survey on mangrove subsistence fishers in Zambales, Philippines*).

**References:**

- ADRC (2019) Disaster information: Cyclone Hudhud. Asian Disaster Reduction Center.  
[https://www.adrc.asia/view\\_disaster\\_en.php?NationCode=&Lang=en&Key=1930](https://www.adrc.asia/view_disaster_en.php?NationCode=&Lang=en&Key=1930). Accessed 11 February 2023
- Aguilar-Román E, Castillo A, Güiza F (2020) Vulnerability and risk management after hurricane Patricia in a rural community on the Jalisco coast, Mexico. *Int J Disaster Risk Reduc* 45:1-17  
<https://doi.org/10.1016/j.ijdrr.2019.101464>
- Alberts-Hubatsch H, Lee SY, Meynecke JO, Diele K, Nordhaus I, Wolff M (2015) Life-history, movement, and habitat use of *Scylla serrata* (Decapoda, Portunidae): current knowledge and future challenges. *Hydrobiologia* 763:5–21. <https://doi.org/10.1007/s10750-015-2393-z>
- Akhir MYM, Nor FM, Ibrahim MI, Shafel MN (2018) Association between environmental factors and typhoid fever post massive flood in Northeastern Malaysia. *World Appl Sci J*. 36: 799-805.  
<https://doi.org/10.5829/idosi.wasj.2018.799.805>
- Ali M, Nelson AR, Lopez AL, Sack DA (2015) Updated global burden of Cholera in endemic countries. *PLoS Negl. Trop Dis* 9:1-13. <https://doi.org/10.1371/journal.pntd.0003832>
- Allan GL, Maguire GB (1991) Lethal levels of low dissolved oxygen and effects of short-term oxygen stress on subsequent growth of juvenile *Penaeus monodon*. *Aquac* 94:27-37. [https://doi.org/10.1016/0044-8486\(91\)90126-R](https://doi.org/10.1016/0044-8486(91)90126-R)
- Allan GL, Maguire GB (1992) Effects of pH and salinity on survival, growth, and osmoregulation in *Penaeus monodon* Fabricius. *Aquac* 107:33-47. [https://doi.org/10.1016/0044-8486\(92\)90048-P](https://doi.org/10.1016/0044-8486(92)90048-P)
- Aquino DH, Wilkinson SJ, Raftery G, Potangaroa R, Chang-Richards A (2018) Challenges to building housing resilience: the case of Fiji post-cyclone Winston. *Procedia Eng* 212:475–480.  
<https://doi.org/10.1016/j.proeng.2018.01.061>
- Arsad AA (2019) Heat related illness. *Saudi Med J* 40:1195-1201. <https://doi.org/10.15537/smj.2019.12.24727>
- Bachman P, Rand GM (2008) Effects of salinity on native estuarine fish species in South Florida. *Ecotoxicol* 17: 591-597. <https://doi.org/10.1007/s10646-008-0244-7>
- Baker SM, Mann R (1992) Effects of hypoxia and anoxia on larval settlement, juvenile growth, and juvenile survival of the oyster *Crassostrea virginica*. *Biol Bull* 182:265-269. <https://doi.org/10.2307/1542120>
- Barman AC, Wong NLWS, Karim MMA (2022) Reproductive cycle of the oyster *Crassostrea (Magallana) saidii* (Wong and Sigwart, 2021) from Southeast Asia. *Aquac Fish* 2022:1-10.  
<https://doi.org/10.1016/j.aaf.2022.05.007>
- Bartholdson S, von Schreeb J (2018) Natural disasters and injuries: What does a surgeon need to know? *Curr Trauma Rep* 4:103-108. <https://doi.org/10.1007/s40719-018-0125-3>
- Birtwell IK (2000) The effects of sediment on fish and their habitat. DFO Pacific region. <https://waves-vagues.dfo-mpo.gc.ca/library-bibliotheque/255660.pdf>. Accessed 12 December 2022
- Brill D, May SM, Engel M, Reyes M, Pint A, Opitz S, Dierick M, Gonzalo LA, Esser S, Brückner H (2016) Typhoon Haiyan’s sedimentary record in coastal environments of the Philippines and its palaeotempestological implications. *Nat Hazards Earth Syst Sci* 16:2799–2822. <https://doi.org/10.5194/nhess-16-2799-2016>

- Bommireddy S, Kumar SK, Prasad A, Rao CA (2021) Influence of turbidity on survival of white leg shrimp (*Litopenaeus vannamei*) grow out phase in SPSR Nellore district, Andhra Pradesh, India. *J Bio Innov* 10:1-9. <https://doi.org/10.46344/JBINO.2021.v010i01.01>
- Bordignon F, Zomeno C, Xiccato G, Birolo M, Pascual A, Trocino A (2020) Effect of emersion time on growth, mortality and quality of Pacific oysters (*Crassostrea gigas*, Thunberg 1973) reared in a suspended system in a lagoon in Northern Italy. *Aquac* 528:1-9. <https://doi.org/10.1016/j.aquaculture.2020.735481>
- Boyd CE, Hargreaves JA, Clay JW (2002) Shrimp farming and the environment: Codes of practice and conduct of marine shrimp aquaculture. World Bank, NACA, WWF and FAO Consortium Program, USA
- Briggs MRP, Funge-Smith S, Phillips M, Subasinghe R (2004) Introductions and movement of *Penaeus vannamei* and *Penaeus stylirostris* in Asia and the Pacific. Food and Agriculture Organization of the United Nations. Bangkok
- Britten GL, Dowd M, Canary L, Worm B (2017) Extended fisheries recovery timeline in a changing environment. *Nat Commun* 8:1-7. <https://doi.org/10.1038/ncomms15325>
- Business Standard (2016) Typhoon Meranti kills 28 in China. Business Standard. [https://www.business-standard.com/article/news-ians/typhoon-meranti-kills-28-in-china-116091700657\\_1.html](https://www.business-standard.com/article/news-ians/typhoon-meranti-kills-28-in-china-116091700657_1.html). Accessed 13 March 2023
- Cahigas MML, Prasetyo YT, Persada SF, Nadlifatin R (2023) Examining Filipinos' intention to revisit Siargao after super typhoon Rai 2021 (Odette): An extension of the theory of planned behavior approach. *Int J Disaster Risk Reduc* 84:1-19. <https://doi.org/10.1016/j.ijdrr.2022.103455>
- Cahoon DR, Hensel P, Rybczyk J, McKee KL, Proffitt CE, Perez BC (2003) Mass tree mortality leads to mangrove peat collapse at Bay Islands, Honduras after hurricane Mitch. *J Ecol* 91:1093–1105. <https://doi.org/10.1046/j.1365-2745.2003.00841.x>
- Caputi N, Kangas M, Denham A, Feng M (2016) Management adaptation of invertebrate fisheries to an extreme marine heat wave event at a global warming hot spot. *Ecol Evol* 6:3583-3593. <https://doi.org/10.1002/ece3.2137>
- Caputi N, Kangas M, Chandrapavn A, Feng M, Hart A, Marin M, de Lestang S (2019) Factors affecting the recovery of invertebrate stocks from the 2011 western Australian extreme marine heat wave. *Front Mar Sci* 6:1-18. <https://doi.org/10.3389/fmars.2019.00484>
- CDC (2017) Leptospirosis: Signs and symptoms. Centre for Disease Control and Prevention. <https://www.cdc.gov/leptospirosis/symptoms/index.html#:~:text=The%20illness%20lasts%20from%20a,covery%20may%20take%20several%20months>. Accessed 30 July 2023
- CDC (2020) Viral hepatitis. Centre for Disease Control and Prevention. <https://www.cdc.gov/hepatitis/hav/afaq.htm#:~:text=Adults%20are%20more%20likely%20to,as%20long%20as%206%20months>. Accessed 30 July 2023
- CDC (2021) Dengue: Signs and symptoms. Centre for Disease Control and Prevention. <https://www.cdc.gov/dengue/symptoms/index.html#:~:text=Symptoms%20of%20dengue%20typically%20last,recover%20after%20about%20a%20week>. Accessed 30 July 2023

- CDC (2022) Malaria: Disease. Centre for Disease Control and Prevention.  
<https://www.cdc.gov/malaria/about/disease.html>. Accessed 31 July 2023
- Chan M, Johansson MA (2012) The incubation periods of Dengue viruses. *PLoS One* 7:1-7  
<https://doi.org/10.1371/journal.pone.0050972>.
- Chandrapavan A, Caputi N, Kangas MI (2019) The decline and recovery of a crab population from an extreme marine heat wave and a changing climate. *Front Mar Sci* 6:1-12. <https://doi.org/10.3389/fmars.2019.00510>
- Chauhan A, Dash P, Singh R, Kumar R (2020) Impact of tropical cyclone "Fani" on land, ocean, atmospheric and meteorological parameters. *Mar Pollut Bull* 162:1-15. <https://doi.org/10.1016/j.marpolbul.2020.111844>
- Cheung WWL, Frolicher TL (2020) Marine heat waves exacerbate climate change impacts for fisheries in the northeast Pacific. *Sci Rep* 10:1-10. <https://doi.org/10.1038/s41598-020-63650-z>
- Cleveland clinic (2023) Dehydration. Cleveland clinic. <https://my.clevelandclinic.org/health/treatments/9013-dehydration>. Accessed 01 August 2023
- Climate Impact Explorer (2023) Climate impacts. <https://climate-impact-explorer.climateanalytics.org/impacts/?region=PHL&indicator=tasmaxAdjust&scenario=rcp85&subregion=P.H.PN&warmingLevel=1.5&temporalAveraging=annual&spatialWeighting=area&compareYear=2030>. Accessed 15 August 2023
- Colden A, Lipcius RN (2015) Lethal and sublethal effects of sediment burial on the eastern oyster, *Crassostrea virginica*. *Mar Ecol Prog Ser* 527:105-117. <https://doi.org/10.3354/meps11244>
- Coxe NC (2022) Effects of hypoxia and high temperature on eastern oysters: investigating differential tolerance in populations and ploidies. Master's Theses. Louisiana State University.
- Davenport J, Wong TM (1987) Responses of adult mud crabs (*Scylla serrata* Forskål) to salinity and low oxygen tension. *Comp biochem Physiol Mol Part A* 86:43-47. [https://doi.org/10.1016/0300-9629\(87\)90274-X](https://doi.org/10.1016/0300-9629(87)90274-X)
- Davis CPD (2022) Heat stroke (Sunstroke). Emedicine health: First aid and injuries centre.  
[https://www.emedicinehealth.com/heat\\_stroke/article\\_em.htm](https://www.emedicinehealth.com/heat_stroke/article_em.htm). Accessed 01 August 2023
- Des M, Fernandez-Novoa D, deCastro M, Gomez-Gesteria JL, Sousa MC, Gomez-Gesteria M (2021) Modeling salinity drop in estuarine areas under extreme precipitation events within a context of climate change: Effect on bivalve mortality in Galician Rías Baixas. *Sci Total Environ* 790:1-11.  
<https://doi.org/10.1016/j.scitotenv.2021.148147>
- DFAT (2021) Tropical cyclone Harold. Australian Government Department of Foreign Affairs and Trade.  
<https://www.dfat.gov.au/crisis-hub/tropical-cyclone-harold>. Accessed 22 March 2023
- Dinh QM, Truong NT, Duc Nguyen TH, Huyen Tran LT, Kieu Nguyen TT, Phan LH (2022) Variations in length-weight relationship, growth, and body condition of the commercial mullet *Ellochelon vaigiensis* in the Vietnamese Mekong Delta. *Heliyon* 8:1-8. <https://doi.org/10.1016/j.heliyon.2022.e11789>
- Ellison JC (1999) Impacts of sediment burial on mangroves. *Mar Pollut Bull* 37:420-426.  
[https://doi.org/10.1016/s0025-326x\(98\)00122-2](https://doi.org/10.1016/s0025-326x(98)00122-2)

- Empeno OE Jr., Gregorio OE (2015) State of the mangroves in Masinloc, Zambales. In: Salmo III SG, Favis AMT, Ting MNS, State of mangrove summit: Northwestern Luzon proceedings. Ateneo de Manila University, Quezon City
- Ezer T (2020) The long-term and far-reaching impact of hurricane Dorian (2019) on the Gulf Stream and the coast. *J Mar Sci* 208:1-15. <https://doi.org/10.1016/j.jmarsys.2020.103370>
- FAO (2009a) Cultured aquatic species fact sheets: *Mugil cephalus* (Linnaeus, 1758). [https://www.fao.org/fishery/docs/CDrom/aquaculture/I1129m/file/en/en\\_flatheadgreymullet.htm](https://www.fao.org/fishery/docs/CDrom/aquaculture/I1129m/file/en/en_flatheadgreymullet.htm). Accessed 05 August 2023
- FAO (2009b) Cultured aquatic species fact sheets: *Penaeus vannamei* (Boone, 1931). [https://www.fao.org/fishery/docs/DOCUMENT/aquaculture/CulturedSpecies/file/en/en\\_whitelegshrimp.htm](https://www.fao.org/fishery/docs/DOCUMENT/aquaculture/CulturedSpecies/file/en/en_whitelegshrimp.htm). Accessed 05 August 2023
- Faturrohman K, Nirmala K, Djokosetiyanto D, Hastuti YP (2017) The concentration of optimum dissolved oxygen levels for growth of mangrove crab *Scylla serrata* seed in recirculation system. *Indones Aquac J* 16:107-115. <https://doi.org/10.19027/jai.16.1.107-115>
- Feher LC, Osland MJ, Anderson GH, Vervaeke WC, Krauss KW, Whelan KRT, Balentine KM, Tiling-Range G, Smith TJ, Cahoon DR (2019) The long-term effects of hurricanes Wilma and Irma on soil elevation change in everglades mangrove forests. *Ecosystems* 23:917-931. <https://doi.org/10.1007/s10021-019-00446-x>
- Franco E, Meleleo C, Serino L, Sorbara D, Zaratti L (2012) Hepatitis A: Epidemiology and prevention in developing countries. *World J Hepatol* 4:68-73. <https://doi.org/10.4254/wjh.v4.i3.68>
- Go Cheng KJ, Rivera AS, Lam HY, Ulitin AR, Nealon J, Dizon R, Wu DBC (2020) Influenza-associated excess mortality in the Philippines, 2006-2015. *PLoS ONE*. 15:1-11. <https://doi.org/10.1371/journal.pone.0234715>
- Hallwright J, Handmer J (2019) Accountability and transparency in disaster aid: Cyclone Pam in Vanuatu. *Int J Disaster Risk Reduc* 36:1-8. <https://doi.org/10.1016/j.ijdrr.2019.101104>
- Hansten M (2017) Harvesting wild Pacific oysters, *Crassostrea gigas*—developing methods for locating and live-storing marketable individuals. Thesis. Yrkeshögskolan Novia
- Health Australia (2023) Diarrhoea. Health direct. <https://www.healthdirect.gov.au/diarrhoea>. Accessed 04 August 2023
- Hewitt DR, Duncan PF (2002) Effect of high-water temperature on the survival, moulting and food consumption of *Penaeus (Marsupenaeus) japonicus* (Bate, 1888). *Aquac Res* 32:305-313. <https://doi.org/10.1046/j.1365-2109.2001.00560.x>
- Hong HK, Park HS, Choi KS (2022) Growth and reproduction of the pacific oyster *Crassostrea gigas* cultured on tidal flat in Hebei spirit oil spill area on the west coast of Korea four years after the accident. *Front Mar Sci* 9:1-12. <https://doi.org/10.3389/fmars.2022.880210>
- Ji ZL, Li RH, Wang CL, Zhang ZY, Zhang WJ, Mu CK, et al (2022). Effect of long-term low-salinity culture on the survival, growth, and nutrient composition of mud crab *Scylla paramamosain*. *J Ocean Univ China* 21:179–185. <https://doi.org/10.1007/s11802-022-4812-x>



- Jumawan CQ, Metillo EB, Polistico JP (2021) Assessment of mud crab fishery in Panguil Bay. *Philipp J Fish* 28:17-32. <https://doi.org/10.31398/tpjf/28.1.2020A0002>
- Kathyayani SA, Muralidhar M, Sathish KT, Alavandi SV (2019) Stress quantification in *Penaeus vannamei* exposed to varying levels of turbidity. In: Jithendran KP, Saraswathy R, Balasubramanian CP, Kumaraguru Vasagam KP, Jayasankar V, Raghavan R, Alavandi SV, Vijayan KK (eds) BRAQCON 2019: World Brackishwater Aquaculture Conference. *J Coast Res* 86, Florida, pp 177-183
- Keriwala N, Patel A (2022) Impact assessment of tropical cyclone Tauktae on coastal region of Gujarat, India. *ECS Trans* 107:6185–6195. <https://doi.org/10.1149/10701.6185ecst>
- Kishore N, Marques D, Mahmud A, Kiang MV, Rodriguez I, Fuller A, Ebner P, Sorensen C, Racy F, Lemery J, Maas L, Leaning, J, et al. (2018) Mortality in Puerto Rico after Hurricane Maria. *N Engl J Med* 379:162-170. <https://doi.org/10.1056/NEJMsa1803972>
- Knight KL (2008) More precise classification of orthopaedic injury types and treatment will improve patient care. *J Athl Train* 43:117-118. <https://doi.org/10.4085/1062-6050-43.2.117>
- Kumar S, Lal P, Kumar A (2021) Influence of super cyclone ‘Amphan’ in the Indian Subcontinent amid COVID-19 Pandemic. *Remote Sens Earth Syst Sci* 4:96-103. <https://doi.org/10.1007/s41976-021-00048-z>
- Li D, Huang CY (2018) The influences of ocean on intensity of typhoon Soudelor (2015) as revealed by coupled modeling. *Atmos Sci Lett* 20:1-7. <https://doi.org/10.1002/asl.871>
- Li C, Zhao Q, Zhao Z, Liu Q, Ma W (2021) The association between tropical cyclones and dengue fever in the Pearl River Delta, China during 2013-2018: A time-stratified case-crossover study. *PLoS Negl Trop Dis* 15:1-15. <https://doi.org/10.1371/journal.pntd.0009776>
- Liu Z, Lao J, Zhang Y, Liu Y, Zhang J, Wang H, Jiang B (2018) Association between floods and typhoid fever in Yongzhou, China: Effects and vulnerable groups. *Environ Res* 167:718-724. <https://doi.org/10.1016/j.envres.2018.08.030>
- Long WC, Brylawski BJ, Seitz RD (2008) Behavioral effects of low dissolved oxygen on the bivalve *Macoma balthica*. *J Exp Mar Biol Ecol* 359:34-39. <https://doi.org/10.1016/j.jembe.2008.02.013>
- Lowe MR, Sehlinger T, Soniat TM, La Peyre MK (2017) Interactive effects of water temperature and salinity on growth and mortality of eastern oysters, *Crassostrea virginica*: A meta-analysis using 40 years of monitoring data. *J Shellfish Res* 36:663-697. <https://doi.org/10.2983/035.036.0318>
- Lunt J, Smee DL (2014) Turbidity influences trophic interactions in estuaries. *Limnol Oceanog* 59:2002-2012. <https://doi.org/10.4319/lo.2014.59.6.2002>
- Mangubhai S, Nand Y, Reddy C, Jagadish A (2021) Politics of vulnerability: Impacts of Covid-19 and cyclone Harold on Indo-Fijians engaged in small-scale fisheries. *Environ Sci Policy* 120:195–203. <https://doi.org/10.1016/j.envsci.2021.03.003>
- Manning EP (2007) Dehydration in extreme temperatures while conducting stability and support operations in a combat zone. *Mil Med* 172:972-976. <https://doi.org/10.7205/MILMED.172.9.972>
- Marlier ME, Resetar SA, Lachman BE, Anania K, Adams K (2022) Remote sensing for natural disaster recovery: Lessons learned from hurricanes Irma and Maria in Puerto Rico. *Environ Sci Policy* 132:153–159.

<https://doi.org/10.1016/j.envsci.2022.02.023>

- Mastrangelo G, Fedeli U, Visentin C, Milan G, Fadda E, Spolaore P (2007) Pattern and determinants of hospitalization during heat waves: an ecologic study. *BMC Public Health* 7:1-8. <https://doi.org/10.1186/1471-2458-7-200>
- McNatt RA, Rice JA (2004) Hypoxia-induced growth rate reduction in two juvenile estuary-dependent fishes. *J Exp Mar Biol Ecol* 311:147-156. <https://doi.org/10.1016/j.jembe.2004.05.006>
- Monteclaro H, Quintio G, Moscoso AD, Napata R, Espectato L, Anraku K, Watanabe K, Ishikawa S (2018) Impacts of typhoon Haiyan on Philippine capture fisheries and implications to fisheries management. *Ocean Coast Manag* 158:128–133. <https://doi.org/10.1016/j.ocecoaman.2018.03.032>
- Mora C, Ospina AF (2001) Tolerance to high temperatures and potentially impact to sea warming on reef fishes of Gorgona Island (tropical eastern Pacific). *Mar Biol* 139:765–769. <https://doi.org/10.1007/s002270100626>
- Nair A (2021) Tauktae killed 67 people, left 8,629 cattle dead in Gujarat, says Centre. *The Indian Express*. <https://indianexpress.com/article/india/tauktae-killed-67-people-left-8629-cattle-dead-in-gujarat-says-centre-7415713>. Accessed 14 March 2023
- NHC-NOAA (2014) Hurricane Odile (EP152014). [https://www.nhc.noaa.gov/data/tcr/EP152014\\_Odile.pdf](https://www.nhc.noaa.gov/data/tcr/EP152014_Odile.pdf). Accessed 11 March 2023
- NHC-NOAA (2018a) Hurricane Michael (AL142018). National Hurricane Center. [https://www.nhc.noaa.gov/data/tcr/AL142018\\_Michael.pdf](https://www.nhc.noaa.gov/data/tcr/AL142018_Michael.pdf). Accessed 12 March 2023
- NHC-NOAA (2018b) Hurricane Willa (EP242018). National Hurricane Center. [https://www.nhc.noaa.gov/data/tcr/EP242018\\_Willa.pdf](https://www.nhc.noaa.gov/data/tcr/EP242018_Willa.pdf). Accessed 12 March 2023
- NHC-NOAA (2020) Hurricane Iota (AL213030). National Hurricane Center. [https://www.nhc.noaa.gov/data/tcr/AL312020\\_Iota.pdf](https://www.nhc.noaa.gov/data/tcr/AL312020_Iota.pdf). Accessed 12 March 2023
- NHC-NOAA (2023) Saffir-Simpson hurricane wind scale. National Hurricane Center and Central Pacific Hurricane Center. National Oceanic and Atmospheric Administration. <https://www.nhc.noaa.gov/aboutsshws.php>. Accessed 30 August 2023
- Nonwachai T, Purivirojku W, Chuchird N, Limsuwan C (2011) Effects of dissolved oxygen levels on growth, survival, and immune response of juvenile pacific white shrimp (*Litopenaeus vannamei*). *Fish Res Bull Kasetsart Univ* 35:1-10. <https://www.thaiscience.info/journals/Article/KFRB/10892544.pdf>
- NPR (2018) Hurricane Maria caused 2,975 deaths in Puerto Rico, independent study estimates. <https://www.npr.org/2018/08/28/642615337/hurricane-maria-caused-2-975-deaths-in-puerto-rico-independent-study-estimates>. Accessed 12 March 2023
- Nsereko G, Kadobera D, Okethwangu D, Nguna J, Rutazaana D, Kyabayinze DJ, Opigo J, Ario AR (2020) Malaria outbreak facilitated by appearance of vector-breeding sites after heavy rainfall and inadequate preventive measures: Nwoya District, Northern Uganda, February-May 2018. *J Environ Public Health* 2020:1-10. <https://doi.org/10.1155/2020/5802401>
- OCHA (2020) Typhoon Vongfong leaves trail of damage as the country grapples with the ‘new normal’. United Nations Office for the Coordination of Humanitarian Affairs. <https://reports.unocha.org/en/country/asia->

- pacific/card/tjXV99QVBE/. Accessed 13 March 2023
- Parida BR, Behera SN, Oinam B, Patel NR, Sahoo RN (2018) Investigating the effects of episodic Super-cyclone 1999 and Phailin 2013 on hydro-meteorological parameters and agriculture: An application of remote sensing. *Remote Sens Appli: Soc Environ* 10:128–137. <https://doi.org/10.1016/j.rsase.2018.03.010>
- Plante S, Chabot D, Dutil JD (1998) Hypoxia tolerance in Atlantic cod. *J Fish Biol* 53:1342–1356. <https://doi.org/10.1111/j.1095-8649.1998.tb00253.x>
- Rajapakse S (2022) Leptospirosis: clinical aspects. *Clin Med (Lond)* 22:14-17. <https://doi.org/10.7861/clinmed.2021-0784>
- Reliefweb (2015) Typhoon Soudelor kills 26 in E China. Reliefweb. OCHA Services. <https://reliefweb.int/report/china/typhoon-soudelor-kills-26-e-china>. Accessed 11 March 2023
- Reliefweb (2017) Typhoon Haima emergency appeal final report (MDRPH022). Reliefweb. OCHA Services. <https://reliefweb.int/report/philippines/philippines-typhoon-haima-emergency-appeal-final-report-mdrph022>. Accessed 11 March 2023
- Reliefweb (2019) Tropical cyclone Fani – Apr 2019. Reliefweb. OCHA Services. <https://reliefweb.int/disaster/tc-2019-000041-ind>. Accessed 11 March 2023
- Reliefweb (2023) The Bahamas: Hurricane Dorian – Final Report (MDRBS003). Reliefweb. OCHA Services. <https://reliefweb.int/report/bahamas/bahamas-hurricane-dorian-final-report-mdrbs003>. Accessed 12 March 2023
- Roberts SD, Van Ruth PD, Wilkinson C, Bastianello SS, Bansemer MS (2019) Marine heat wave, harmful algae blooms and an extensive fish kill event during 2013 in South Australia. *Front Mar Sci* 6:1-20. <https://doi.org/10.3389/fmars.2019.00610>
- Rosas C, Martinez E, Gaxiola G, Brito R, Sanchez A, Soto LA (1998) The effect of dissolved oxygen and salinity on oxygen consumption, ammonia excretion and osmotic pressure of *Penaeus setiferus* (Linnaeus) juveniles. *J Exp Mar Biol Ecol* 234:41-57. [https://doi.org/10.1016/S0022-0981\(98\)00139-7](https://doi.org/10.1016/S0022-0981(98)00139-7)
- Ruscoe IM, Shelley CC, Williams GR (2004) The combined effects of temperature and salinity on growth and survival of juvenile mud crabs (*Scylla serrata* Forskål). *Aquac* 238: 239-247. <https://doi.org/10.1016/j.aquaculture.2004.05.030>
- Sanda T, Shimizu T, Dan S, Hamasaki K (2022) Temperature tolerance of juveniles of two mud crab species, *Scylla paramamosain* and *Scylla serrata* (Decapoda: Brachyura: Portunidae). *Crust Res* 51:129-135. [https://doi.org/10.18353/crustacea.51.0\\_129](https://doi.org/10.18353/crustacea.51.0_129)
- Sanders JA, Warren B, Hanrahan T, Wright W (2015) Sand Wars. Excessive sedimentation on Grays Harbor oyster beds: Likely causes and recommended mitigation. Grays Harbor Conservation District. [https://www.ezview.wa.gov/Portals/\\_1492/Documents/01-Final%20main%20report%20on%20sediment%20mitigation%20for%20GH%20oyster%20beds%2006-30-15.pdf](https://www.ezview.wa.gov/Portals/_1492/Documents/01-Final%20main%20report%20on%20sediment%20mitigation%20for%20GH%20oyster%20beds%2006-30-15.pdf). Accessed 20 July 2023
- Santos CT, Toda L, Orduna JR, Santos FD, Derrao J (2016) The impacts of typhoon Haiyan in the Philippines: Implications to land use planning. *Clim Disaster Dev J* 1:57-66. <https://doi.org/10.18783/cddj.v001.i01.a06>

- Santos GDC (2021) 2020 tropical cyclones in the Philippines: A review. *Trop Cyclone Res Rev* 10:191–199.  
<https://doi.org/10.1016/j.tcr.2021.09.003>
- Seager J, Milne I, Mallett M, Sims I (2000) Effects of short-term oxygen depletion on fish. *Environ Toxicol Chem* 19:2937-2942. <https://doi.org/10.1002/etc.5620191214>
- Sehlinger T (2018) Analysis of temperature and salinity effects on growth and mortality of oysters (*Crassostrea virginica*) in Louisiana (2018). Dissertation, University of New Orleans. <https://scholarworks.uno.edu/td/2515>
- Senkbeil JC, Myers L, Jasko S, Reed JR, Mueller R (2020) Communication and hazard perception lessons from category five hurricane Michael. *Atmosphere* 11:1-19. <https://doi.org/10.3390/atmos11080804>
- Shives JA, Dunbar SG (2010) Behavioral responses to burial in the hermit crab, *Pagurus samuelis*: Implications for the fossil record. *J Exp Mar Biol Ecol* 388:33-38. <https://doi.org/10.1016/j.jembe.2010.03.008>
- UNESCAP (2021) Cyclone Tauktae: a perfect storm of climate change and pandemic. ICT and disaster risk reduction. United Nations Economic and Social Commission for Asia and Pacific.  
<https://www.unescap.org/blog/cyclone-tauktae-perfect-storm-climate-change-and-pandemic>. Accessed 15 June 2023
- van Vuuren DP, Edmonds J, Kainuma M, Riahi K, Thomson A, Hibbard K, Hurtt GC, Kram T, Krey V, Lamarque J-F, Masui T, Meinshausen M, Nakicenovic N, Smith SJ, Rose SK (2011) The representative concentration pathways: an overview. *Clim Change* 109:5-31. <https://doi.org/10.1007/s10584-011-0148-z>
- Ventura RJ, Muhi E, delos Reyes VC, Sualdito MN, Tayag E (2015) A community-based gastroenteritis outbreak after Typhoon Haiyan, Leyte, Philippines, 2013. *Western Pac Surveill Response J* 6:1–6.  
<https://doi.org/10.2471/WPSAR.2014.5.1.010>
- Vinagre C, Leal I, Mendonca V, Flores AAV (2015) Effect of warming rate on the critical thermal maxima of crabs, shrimp and fish. *J Therm Biol* 47:19-25. <https://doi.org/10.1016/j.jtherbio.2014.10.012>
- Wang T, Li Q (2018) Effects of salinity and temperature on growth and survival of juvenile Iwagaki oyster *Crassostrea nippona*. *J Ocean Univ China* 17:941-946. <https://doi.org/10.1007/s11802-018-3536-4>
- Whitfield AK, Taylor RH, Fox C, Cyrus DP (2006) Fishes and salinities in the St Lucia estuarine system—a review. *Rev Fish Biol Fish* 16:1-20. <https://doi.org/10.1007/s11160-006-0003-x>
- WHO (2010) The global prevalence of Hepatitis A virus infection and susceptibility: A systematic review. World Health Organization, Geneva
- WHO (2022) Cholera-global situation. World Health Organization. <https://www.who.int/emergencies/disease-outbreak-news/item/2022-DON426>. Accessed 05 August 2023
- Wingard GL, Bergstresser SE, Stackhouse BL, Jones MC, Marot ME, Hoefke K, Daniels A, Keller K (2019) Impacts of Hurricane Irma on Florida Bay Islands, Everglades National Park, USA. *Estuar Coast* 43:1070–1089. <https://doi.org/10.1007/s12237-019-00638-7>
- World Bank (2014) India averts devastation from cyclone Phailin. World Bank.  
<https://www.worldbank.org/en/results/2014/04/10/india-averts-cyclone-phailin-devastation>. Accessed 12 March 2023
- World Bank (2015) Vanuatu: Six months after cyclone Pam. World Bank.

<https://www.worldbank.org/en/news/feature/2015/09/29/vanuatu-six-months-after-cyclone-pam>. Accessed 12 March 2023

World Vision (2020) 2017 Hurricane Irma: Facts, FAQs, and how to help. World Vision.

<https://www.worldvision.org/disaster-relief-news-stories/2017-hurricane-irma-facts>. Accessed 12 March 2023

Yin S, Lin X, Yang S (2022) Characteristics of rainstorm in Fujian induced by typhoon passing through Taiwan Island. *Trop Cyclone Res Rev* 11:50-59. <https://doi.org/10.1016/j.tccr.2022.04.003>

Young BC, Alfaggeh RH, AlMoutri I, Cheng W (2022) Effects of high salinity on survival, growth, and reproductive performance of red tilapia (*Oreochromis urolepis hornorum* ♀ × *Oreochromis mossambicus* ♂). *Isr J Aquac - Bamidgeh IJA*.74:1-5. <https://doi.org/10.46989/001c.32371>

Zhang P, Li J, Huang G, Zhang X (2006) The effects of body weight, temperature, salinity, pH, light intensity and feeding condition on lethal DO levels of whiteleg shrimp, *Litopenaeus vannamei* (Boone, 1931). *Aquac* 256: 579-587. <https://doi.org/10.1016/j.aquaculture.2006.02.020>

zu Ermgassen PSE, Mukherjee N, Worthington TA, Acosta A, Rocha Araujo AR, da Beiti CM, Castellanos-Galindo GA, Cunha-Lignon M, Dahdouh-Guebas F, Diele K, Parrett CL, Dwyer PG, Gair JR, Johnson AF, Kuguru B, Savio Lobo A, Loneragan NR, Longley-Wood K, Mendonça JT, Meynecke JO (2020) Fishers who rely on mangroves: Modelling and mapping the global intensity of mangrove-associated fisheries. *Estuar Coast Shelf Sci* 247:1-10. <https://doi.org/10.1016/j.ecss.2020.106975>
